# Supplementary figures and images for: Whole Genome Characterization of Prunus Necrotic Ringspot Virus and Prune Dwarf Virus Infecting Stone Fruits in Russia
Source: MDPI journal article supplement (doi:10.3390/horticulturae9080941), 2023-08-18

M P10 P11 P13 NC

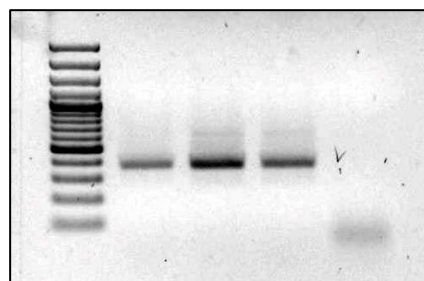

← 380bp

Supplement: s1 [file s1]
